# Supplementary material for: A novel off-on fluorescent chemosensor for Al3+derived from a 4,5-diazafluorene Schiff base derivative
Source: Royal Society of Chemistry journal article supplement (doi:10.1039/c8ra05280h), 2018-01-01
Supplement: c8ra05280h1.pdf [file c8ra05280h1.pdf]

Supplementary Data

**A novel off-on fluorescent chemosensor for Al<sup>3+</sup> derivated from 4,5-diazafluorene Schiff base derivative**

Hui Li<sup>1,2\*</sup>, Jianzhi Wang<sup>1</sup>, ShuJiang Zhang<sup>2</sup>, ChenLiang Gong<sup>2</sup>, Feng Wang<sup>1</sup>

1. Key Laboratory for Green Chemical Process of Ministry of Education, School of Chemical Engineering and Pharmacy, Wuhan Institute of Technology, Wuhan 430205, P.R.China

2. College of Chemistry and Chemical Engineering, Lanzhou University, Lanzhou 730000, P.R.China

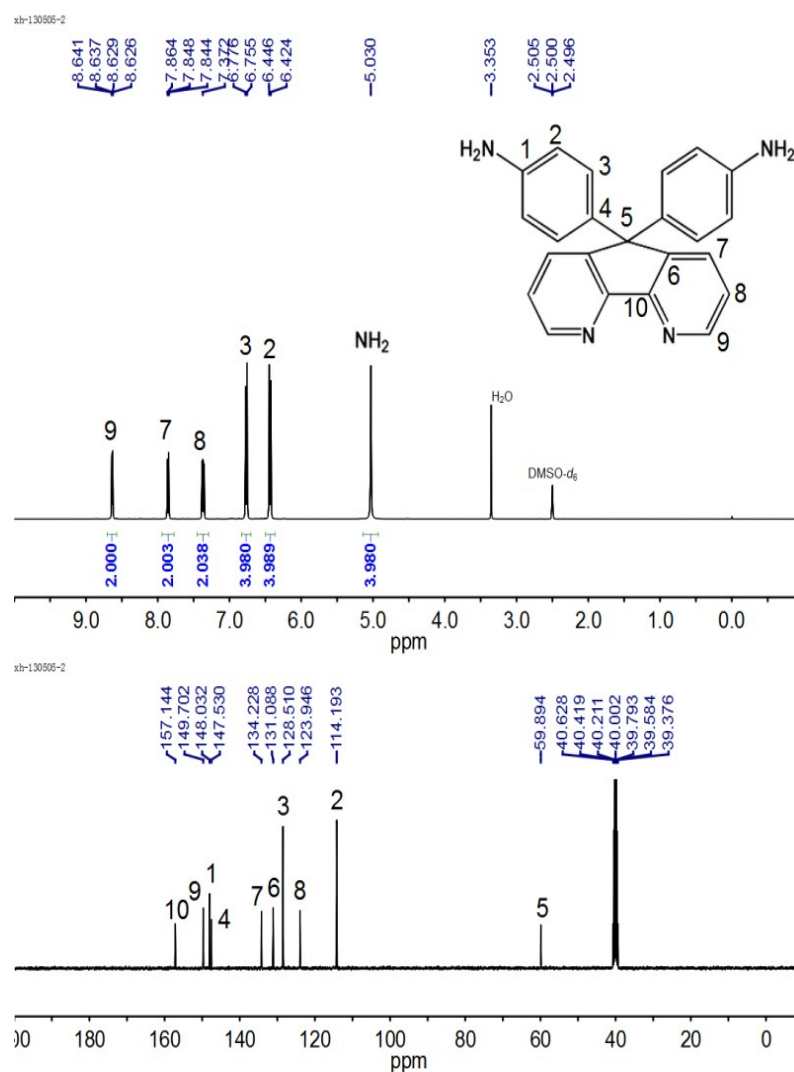

**Figure S1.** <sup>1</sup>H NMR and <sup>13</sup>C NMR spectra of compound 2

\* Corresponding author. E-mail address: [sodium2008@wit.edu.cn](mailto:sodium2008@wit.edu.cn) (Hui Li)

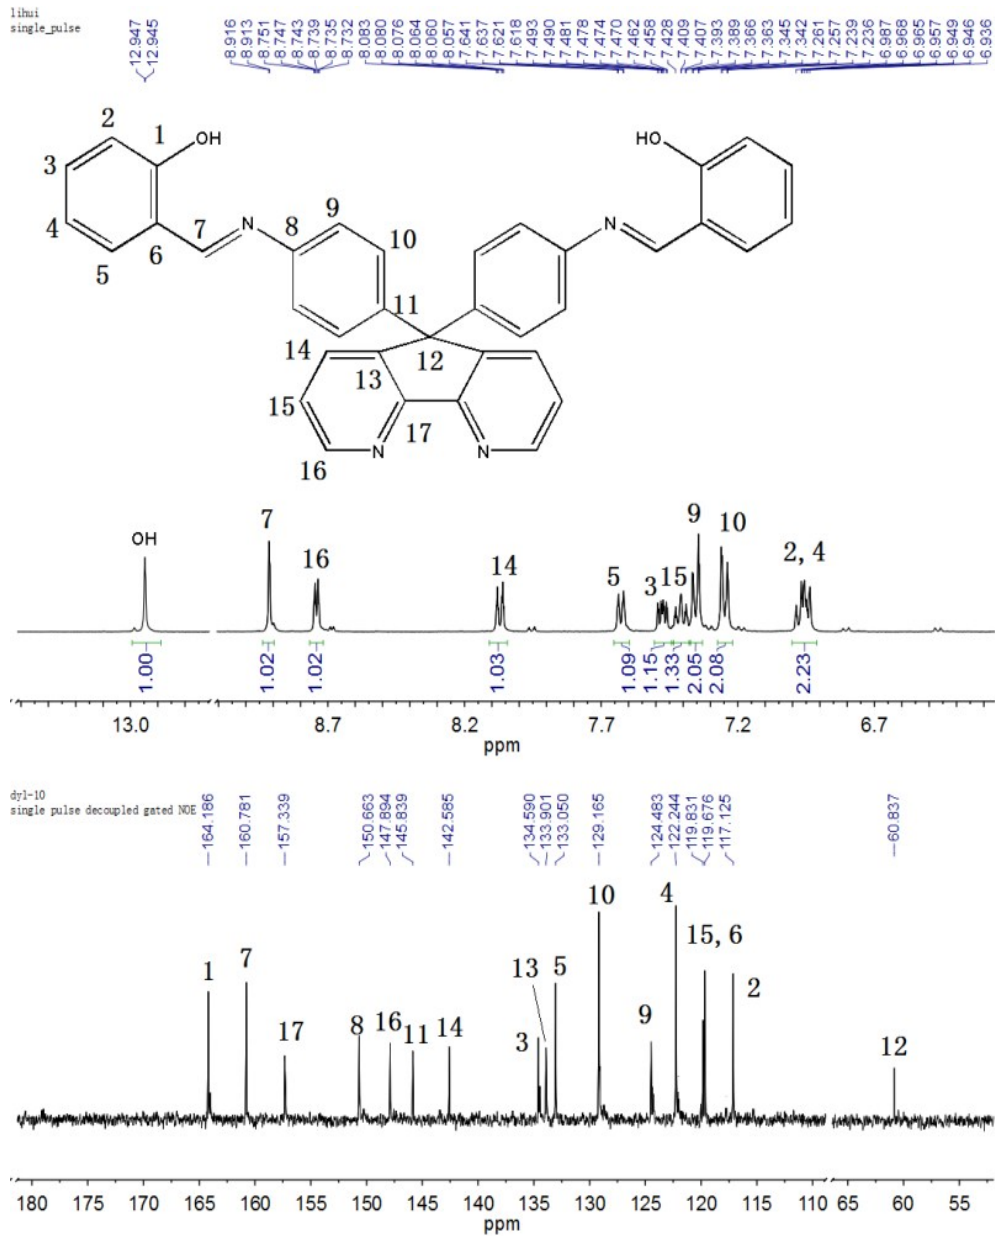

Figure S2.  $^1\text{H}$  NMR and  $^{13}\text{C}$  NMR spectra of Schiff base DFSB

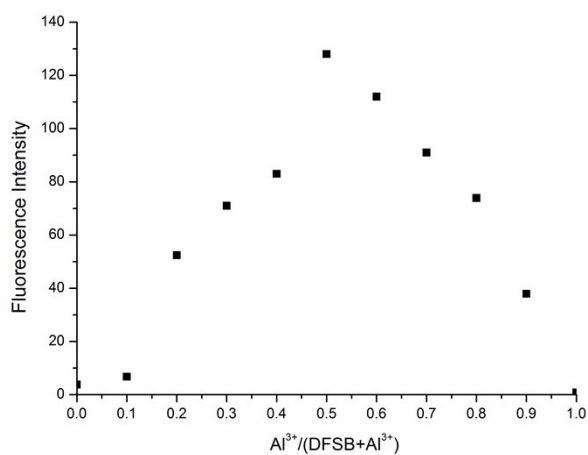

**Figure S3** Job's plot of fluorescent probe (DFSB + Al<sup>3+</sup>) at  $\lambda_{em}=475$  nm

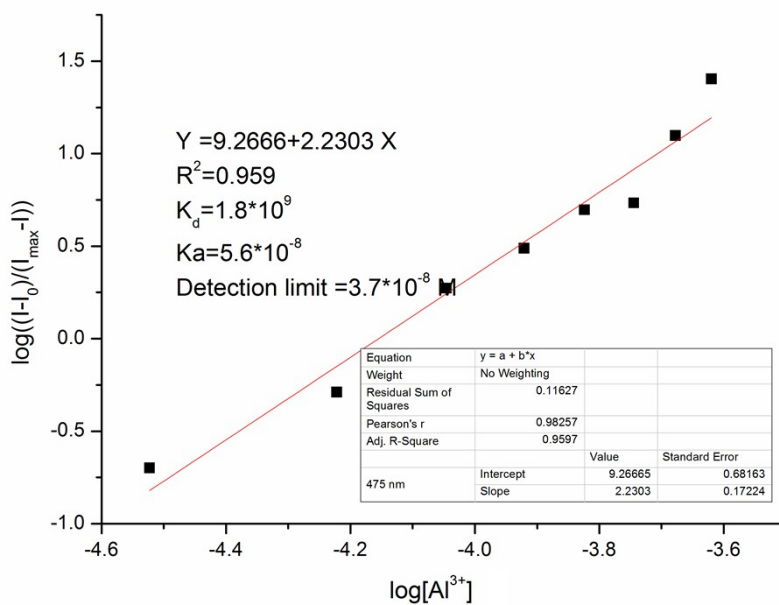

**Figure S4** Hill plot of fluorescent probe (DFSB + Al<sup>3+</sup>) at  $\lambda_{em}=475$  nm
